# Supplementary material
Source: PubMed Central journal article supplement (PMC5424246)
Supplement: JB.00099-17_zjb999094409s1.pdf [file JB.00099-17_zjb999094409s1.pdf]

## Supplementary Information

**Table S1** Primers used in this study

| Description                                               | Sequence (5' to 3')                                                     |
|-----------------------------------------------------------|-------------------------------------------------------------------------|
| 5'- <i>kanR</i>                                           | CAGACCGCTTCTGCGCAGTGGGCTTACATG                                          |
| <i>kanR</i> -3'                                           | GACGGCCAGTGAATTGAAATCTCGTGATGG                                          |
| 5'- <i>rrnB</i> terminator                                | CGCAGAAGCGGTCTGATAAAACAG                                                |
| <i>rrnB</i> terminator-3'                                 | GGAGAGCGTTCACCGACAAACAAC                                                |
| 5'- <i>araC</i> P <sub>BAD</sub>                          | TGATTACGCCAAGCTTGTTAGCCCAAAAAACGG                                       |
| <i>araC</i> P <sub>BAD</sub> -3'                          | CGGTGAACGCTCTCCCAATTGTCTGATTCG                                          |
| 5'- <i>ybeX</i> P <sub>BAD</sub> - <i>Int</i> integration | GTCAAAATCCCGGATGACTCACCCAGCCGAAGCTGGATGAATAAGAAATCTCGTGATGGCAGGTTGGGC   |
| <i>ybeX</i> P <sub>BAD</sub> - <i>Int</i> integration-3'  | TTCAATTAATGAGGCAAAGCCATGTAGTTATCTATCCAGTTTCGGGTTAGCCCAAAAAACGGGTATGGAG  |
| 5'- <i>lpp::catR</i>                                      | CTGGGCGCGGTAATCCTGGGTTCTACTCTGCTGGCAGGTTGCTATGAATATCCTCCTTAG            |
| <i>lpp::catR</i> -3'                                      | GCGCACAATGTGCGCCATTTTTCACTTACAGGTAATATTAGTAGGCTGGAGCTGCTTC              |
| 5'- <i>gutA::P<sub>BAD</sub>-Int</i>                      | CATGGTGCAGAGTGGTTTATCGGGCTGTTCCAAAAGGGCGGAGAGGTGTTTAGACCATGATTACGCCAAGC |
| <i>gutA::P<sub>BAD</sub>-Int</i> -3'                      | CGATCCCGGCGGATATCGTCCGGGACAGGGCCTGCCACATGGACAGTGCCCGTAAAACGACGGCCAGTG   |
| 5'- <i>chiQ::aprR</i>                                     | CTCATCGCCATAATGGCATCGGGGCTGGTAGCTTGTCGCAATCACCTAGATCCTTTTGG             |
| <i>chiQ::aprR</i> -3'                                     | CTGCGTATTTCTGCCAGACTTTATCACAATCGGCTTTACCCGTTCTCCGCTCATGAGC              |
| 5'- <i>Int::specR</i>                                     | GCCTCATTAATTGAACGCCAGCGCATTGCGCTGCTGCTGGCGATTCCCTGCTCGCGCAG             |
| <i>Int::specR</i> -3'                                     | CACAGCAGCAAACCAAACAATGCCGTGACACCCACAGCGGGCTTGAACGAATTGTTAG              |
| 5'- <i>Int</i> pUC19                                      | GATTACGCCAAGCTTAGCCGAAGCTGGATG                                          |
| <i>Int</i> pUC19-3'                                       | GACGGCCAGTGAATTCATGTATTCCGGCAGC                                         |
| 5'- <i>lppK58A</i>                                        | GCTTTTGTGAATTAATTTGTATATCG                                              |
| <i>lppK58A</i> -3'                                        | CACTTACAGGTAATATTACGCGCGGTATTTAGTAG                                     |
| 5'- <i>kanR</i>                                           | CCTCGACTTCGCTGCAAGATCCCCTCACGCTG                                        |
| <i>kanR</i> -3'                                           | AGTACCTGTGAAGTGAAGCTTTTGGTCGGTCATTTTCG                                  |
| 5'- <i>repA</i>                                           | GCAGCGAAGTCGAGGCATTTCTGTC                                               |
| <i>repA</i> -3'                                           | TTAATTCACAAAAGCGAATTCCTCGACAGTAAG                                       |
| 5'- <i>specR</i>                                          | CAGGGGATCAAGATCTATTCCCCTGCTCGCGCAG                                      |
| <i>specR</i> -3'                                          | CTGTGAAGTGAAGCTTGCTTGAACGAATTGTTAG                                      |
| 5'- <i>lppK58A-Strep</i>                                  | CATCCTCAATTTGAAAAATAATAGTACCTGTGAAGTG                                   |
| <i>lppK58A-Strep</i> -3'                                  | ACTCCACGCTGAACCGGATCCCAGCGCGGTATTTAGTAG                                 |
| 5'-pKFC WMC_RS08810 upstream                              | GACGGCCAGTGAATTCAGCCAGTGATTCG                                           |
| pKFC WMC_RS08810 upstream-3'                              | GAGTCCAAGTGTTCCTTAAACGCAATTTTCG                                         |
| 5'-WMC_RS08810 downstream                                 | GAAACACTTGGACTCTTATTAGAAGGCCTG                                          |
| WMC_RS08810 downstream-3'                                 | TGATTACGCCAAGCTCATCTAGTCTTCGG                                           |
| 5'-pKFC BC1526 upstream                                   | GACGGCCAGTGAATTTCTGTGGCAACTGG                                           |
| pKFC BC1526 upstream-3'                                   | CCATTGTTGCGAGTGCAAAAATAGAAAATGC                                         |

|                              |                                        |
|------------------------------|----------------------------------------|
| 5'-pKFC BC1526<br>downstream | GCACTCGCAACAATGGTCTCTGCTTAAAGAG        |
| pKFC BC1526<br>downstream-3' | TGATTACGCCAAGCTAGGCACTACGTACTC         |
| 5'-WMC_RS08810<br>pMSP3535   | CCACTAGTCCC GGGCTGCAGCCTATGTTGTTGATTCC |
| WMC_RS08810<br>pMSP3535-3'   | GAGACCGGCCTCGAGGCGAGCAATTTTGAATTG      |
| 5'-BC1526 pSP-hp             | CAAGGAGGTGAATGTACATTGGATCGATTGATTAC    |
| BC1526 pSP-hp-3'             | CGGCCGGTACCGGATCCTAGAACAGAACTAGACCG    |

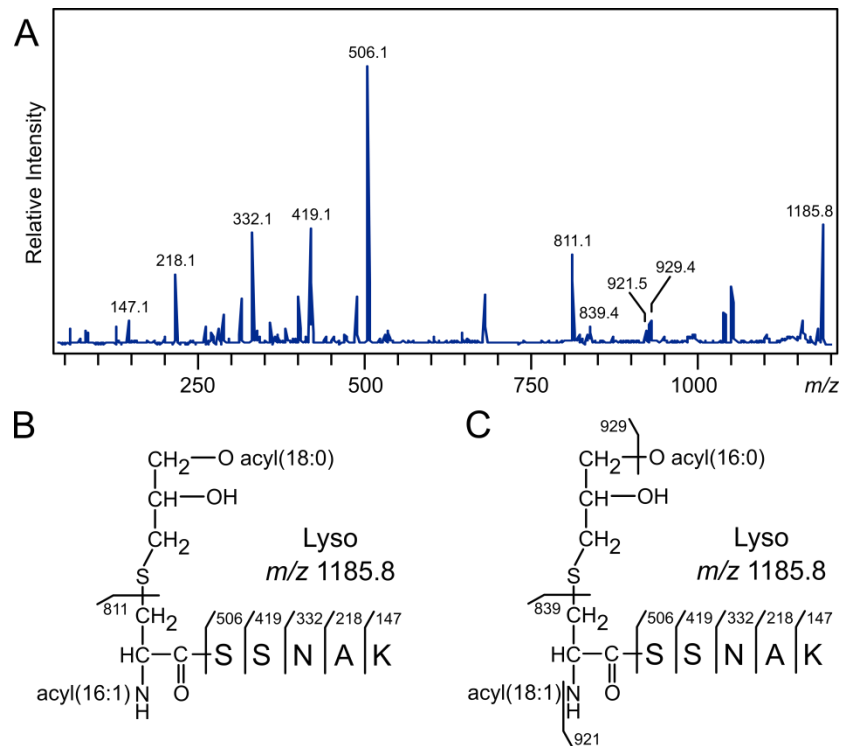

**FIG S1** MALDI-TOF MS/MS Spectrum of the *E.coli* Lpp ion  $m/z$  1185. MS/MS spectrum of the  $m/z$  1185 ion of Lpp purified from KA532 (A) and the two elucidated structures (B and C) of lyso-form Lpp featuring lipidated cysteine with two fatty acids totaling 34:1.

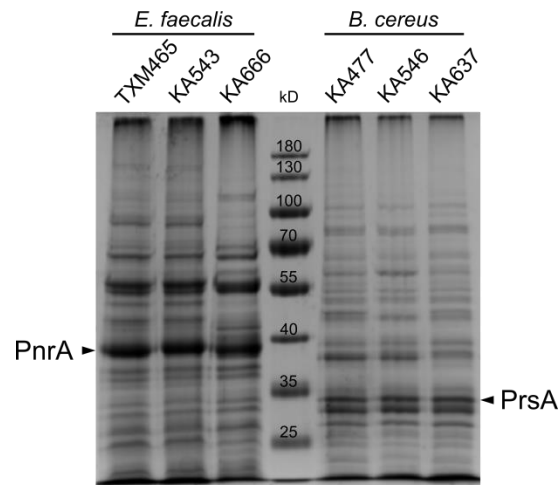

**FIG S2** Lipoproteins from *E. faecalis* and *B. cereus*. Using the Triton X-114 phase partitioning method, lipoproteins were enriched from *E. faecalis* strains TXM465 (WT), KA543 ( $\Delta$ WMC\_RS08810), and KA666 ( $\Delta$ WMC\_RS08810 + pMSP3535-WMC\_RS08810), along with *B. cereus* strains KA477 (WT), KA546 ( $\Delta$ BC1526), and KA637 ( $\Delta$ BC1526 + pSP-BC1526-hp). The resulting Triton X-114 phases were analyzed by SDS-PAGE and visualized by Coomassie blue staining.

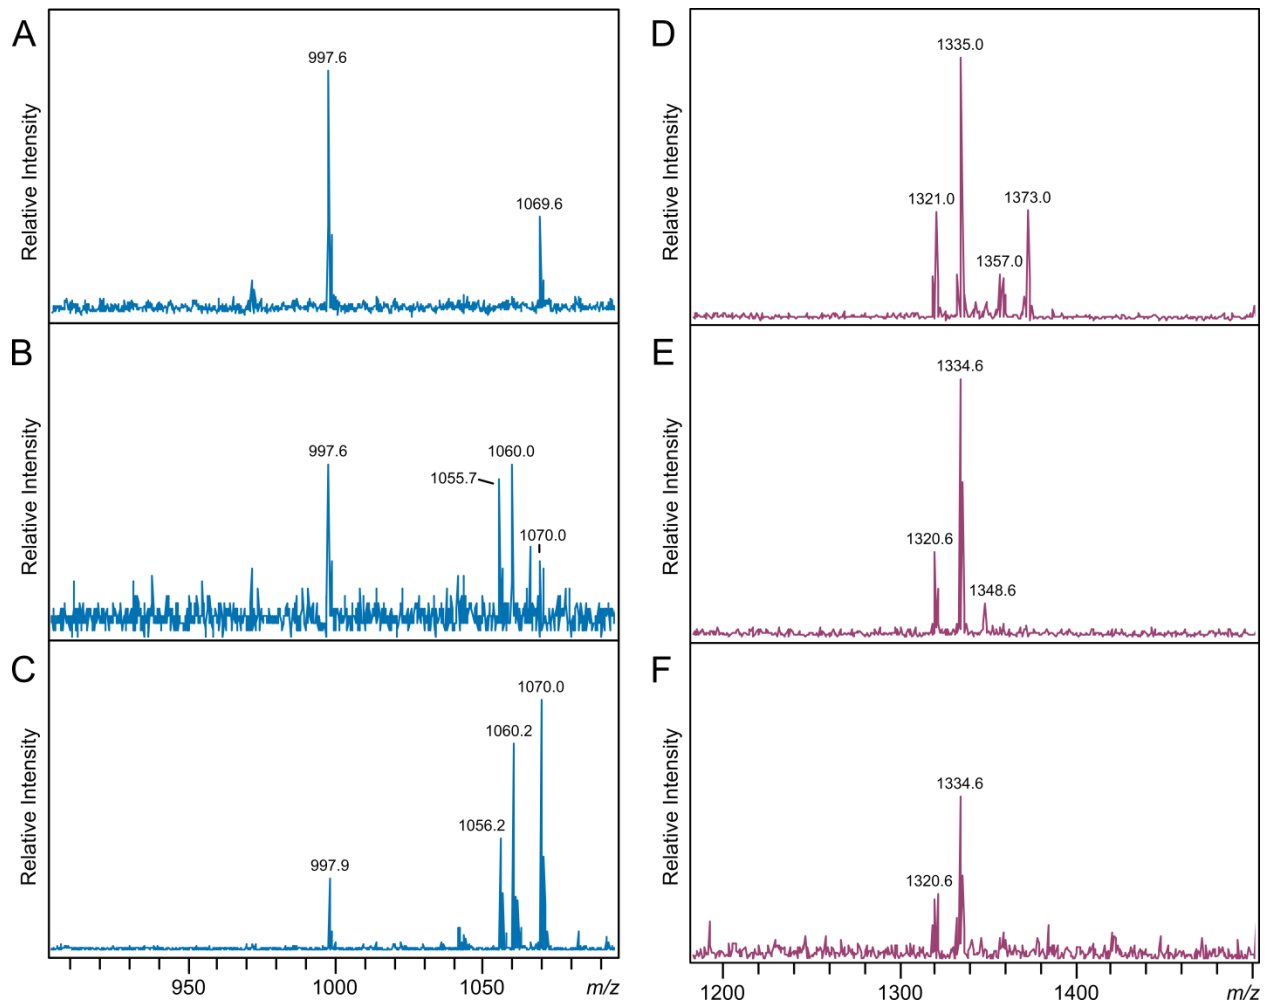

**FIG S3** MALDI-TOF MS of *E. faecalis* PnrA and *B. cereus* PrsA. Parent MS spectra of the  $m/z$  997 ion region corresponding to the *N*-terminal lipopeptide of *E. faecalis* PnrA purified from the wildtype strain (A), the deletion strain (B), and the back-complemented strain (C). MS spectra of the  $m/z$  1334 parent ion region corresponding to the *N*-terminal lipopeptide of *B. cereus* PrsA purified from the wildtype strain (D), the deletion strain (E), and the back-complemented strain (F).
